# Supplementary material for: Optimization of the electron transfer kinetics between a photoanode and biocathode for enhanced carbon-neutral pollutant removal in photocatalytic fuel cells
Source: Royal Society of Chemistry journal article supplement (doi:10.1039/d4ta05290k), 2024-01-01
Supplement: d4ta05290k2.pdf [file d4ta05290k2.pdf]

## Supporting Information

### Optimization of Electron Transfer Kinetics Between Photoanode and Biocathode for Enhanced Carbon-Neutral Pollutant Removal in Photocatalytic Fuel Cells

Xiaofei Gu <sup>‡, a</sup>, Jianyu Han <sup>‡, b, \*</sup>, Zhi Wang <sup>c</sup>, Yixin Hong <sup>a</sup>, Tianyi Huang <sup>a</sup>, Yafeng Wu <sup>a</sup>, Yuanjian Zhang <sup>a</sup>, Songqin Liu <sup>a, \*</sup>

<sup>‡</sup>These two authors contributed equally to this work.

<sup>a</sup> Jiangsu Engineering Laboratory of Smart Carbon-Rich Materials and Device, School of Chemistry and Chemical Engineering, Medical School, Southeast University, Nanjing 211189, China.

<sup>b</sup> School of Energy and Environment, Southeast University, Nanjing 210096, China.

<sup>c</sup> Wuxi Institute of Inspection, Testing and Certification, Wuxi 214125, China.

## Experimental section

### Materials

Formate dehydrogenase from *C. boidinii* (E-FDHCB, EC 1.2.1.2) was purchased from Shanghai Chaoyan Biotechnology Co., Ltd. Cadmium acetate ( $C_4H_6CdO_4 \cdot 2H_2O$ ), thiourea, titanium butoxide, glutaraldehyde, 2-bromoethylamine hydrobromide, aniline, n-hexane, pentafluorobenzyl bromide (BM-PFB), bisphenol A (BPA), congo red (CR) and Aflatoxin B<sub>2</sub> (AFB<sub>2</sub>) were purchased from Aladdin (Shanghai, China). Rhodamine 123 was obtained from KeyGEN Biotech (Nanjing, China). Phytic acid was obtained from Beijing Solarbio Science & Technology Co., Ltd. Tris-HCl buffer solution (0.05 M) was obtained from Beijing LABLEAD Inc. Pyruvic Acid (PA) Content Assay Kit was from Beijing Boxbio Science & Technology Co., Ltd. PBS was purchased from Sunncell. Chlortetracycline was from Chemleader Biomedical Co., Ltd. (Shanghai, China). NAD<sup>+</sup>/NADH Colorimetric Assay Kit was from Elabscience® Biotechnology Co., Ltd. All chemicals were used without further purification. Deionized water was prepared using a Milli-Q purification system with a resistivity of 18.2 MΩ.

### Instrument

<sup>1</sup>H-NMR spectra were collected from a Bruker 600 MHz spectrometer (Bruker, German). Absorbance measurement was performed through using a 2450 UV-visible spectrophotometer (Agilent, USA). Fluorescence (FL) spectra were carried out on a FluoroMax-4 spectrofluorometer with xenon discharge lamp excitation (HORIBA, USA). The morphology of CdS was characterized using scanning electron microscopy (SEM, FEI Inspect F50, America) and corresponding EDX elemental mapping images were obtained by using a JEOL model JEM 2100 (Japan). The morphology of TiO<sub>2</sub>@CdS was characterized using high resolution transmission electron microscopy (HRTEM, Talos F200X, America) and corresponding EDX elemental mapping images were obtained by using a JEOL model JEM 2100 (Japan). X-ray diffraction (XRD) patterns of TiO<sub>2</sub>, CdS and TiO<sub>2</sub>@CdS were recorded by Ultima IV. X-ray photoelectron spectroscopy was carried out with Thermo ESCALAB 250XI, performed with Al K α radiation ( $\lambda = 0.8339$  nm). ICP-OES was performed with Agilent 725 (USA). The Electron Paramagnetic Resonance (EPR) measurement was performed on a Bruker A300 system at room temperature. Total organic carbon (TOC) was recorded by TOC-L. The concentration of the BPA and formate were detected by a high-performance liquid chromatography (HPLC, Agilent, USA) equipped with an X Bridge column (4.6 x 250 mm, C18, 5 mm) and an UV detector. Electrochemical impedance spectroscopy (EIS, Gamry)

analysis was performed in the frequency range of 105 to 0.1 Hz at a bias potential of 0 V versus Ag/AgCl. All electrochemical experiments were performed with CHI 660B. For photocurrent-time (I-T) experiments, ITO glass was cut into 4 cm × 6 cm pieces. A 0.5 mg of TiO<sub>2</sub>, CdS and TiO<sub>2</sub>@CdS were mixed with 100 μL of Nafion solution (1% Nafion in CH<sub>3</sub>CH<sub>2</sub>OH/distilled water = 8/2) and drop-casted on the exposed area (2.65 cm × 2.65 cm) of the ITO electrode, respectively. The resulting electrode was air-dried and used as working electrode for electrochemical measurements.

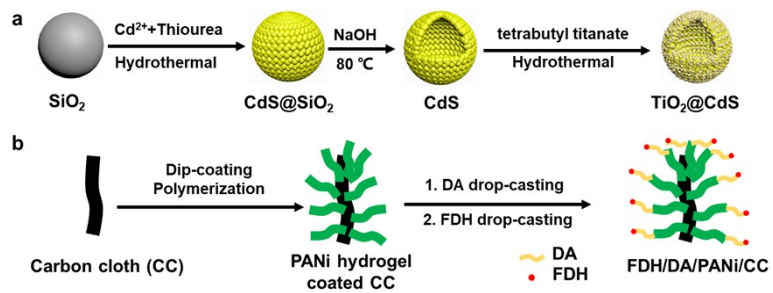

**Fig. S1** Schematic diagram of  $\text{TiO}_2@\text{CdS}$  (a) and FDH/DA/PANI/CC (b) synthesis.

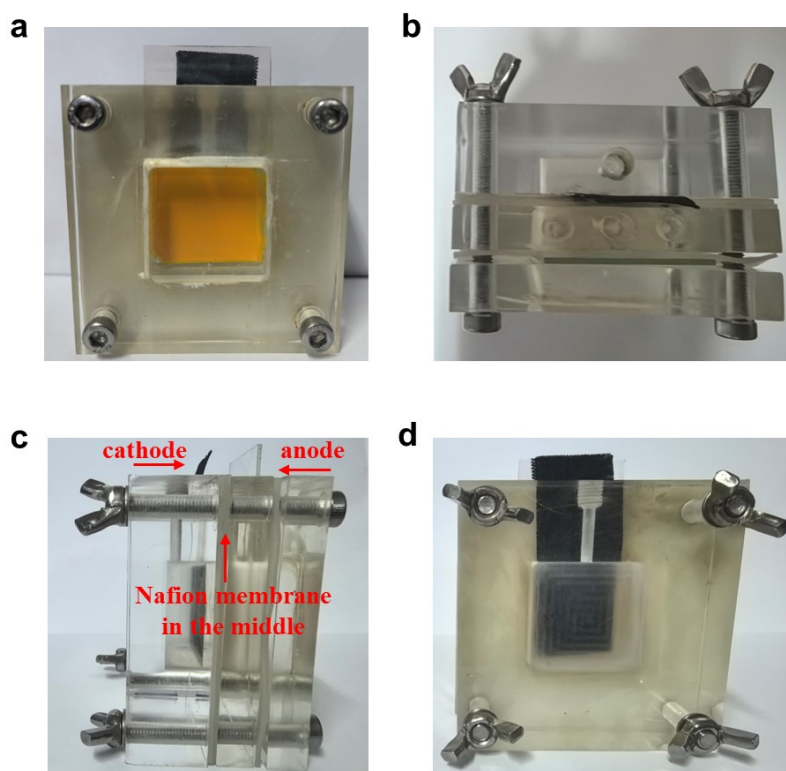

**Fig. S2** Front (a), TOP (b), side (c) and back (d) view picture of PFC system.

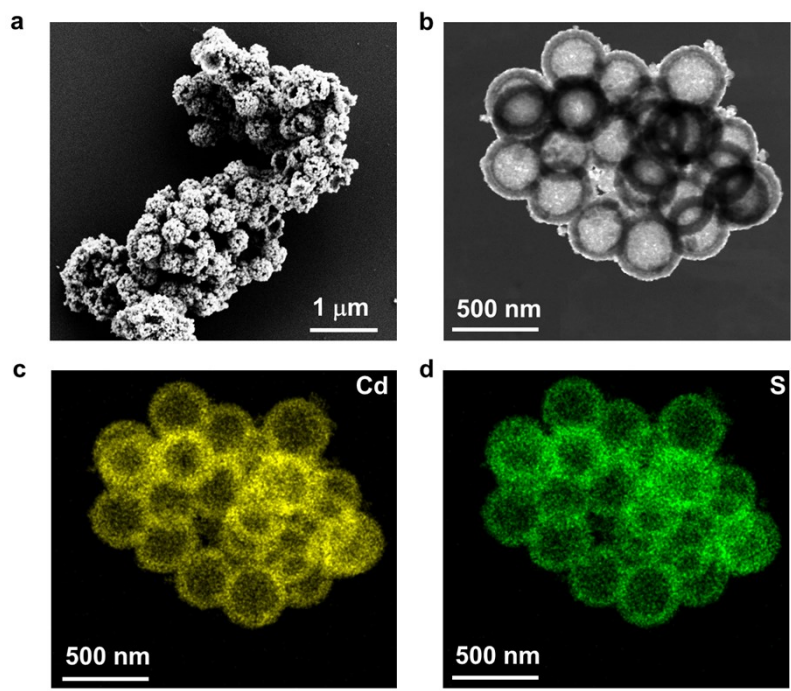

**Fig. S3** SEM (a) and TEM (b) image of CdS and corresponding TEM-EDS elemental mapping images of Cd and S (c and d).

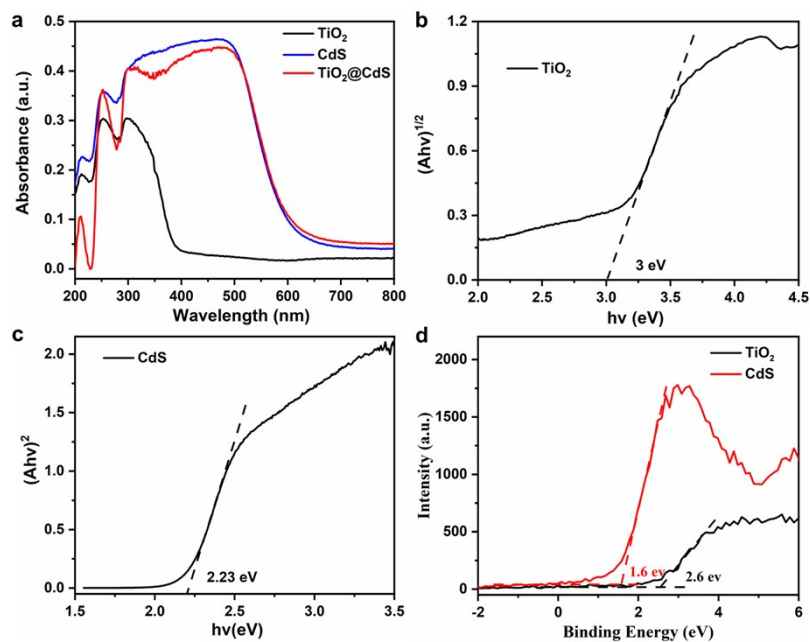

**Fig. S4** (a) UV-vis diffuse reflection spectra of  $\text{TiO}_2$ , CdS and  $\text{TiO}_2@\text{CdS}$ ; Bandgap of  $\text{TiO}_2$  (b) and CdS (c) estimated from the Kubelka–Munk equation according to UV-vis diffuse reflection spectra; (d) Valence band obtained from XPS.

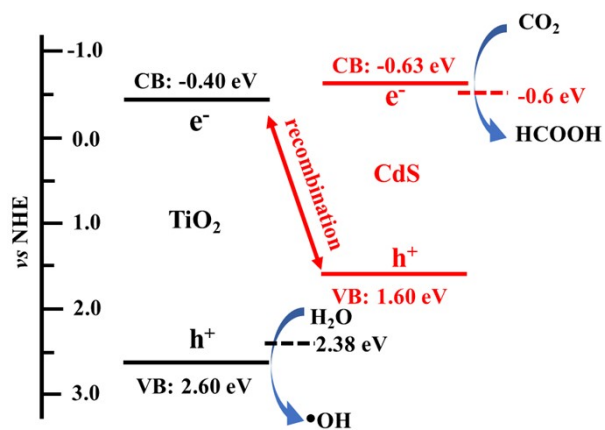

**Fig. S5** The band spectrum of TiO<sub>2</sub>@CdS heterostructures for H<sub>2</sub>O oxidated to •OH and CO<sub>2</sub> reduced to HCOOH.



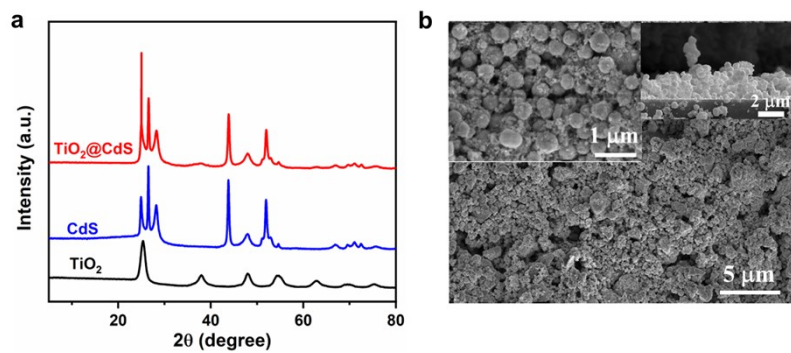

**Fig. S6** (a) PXRD patterns of  $\text{TiO}_2$ , CdS and  $\text{TiO}_2@\text{CdS}$ ; (b) SEM image of  $\text{TiO}_2@\text{CdS}/\text{ITO}$  (inset: the left one is a partially enlarged SEM image and the right one is the cross-sectional SEM image of  $\text{TiO}_2@\text{CdS}/\text{ITO}$ ).

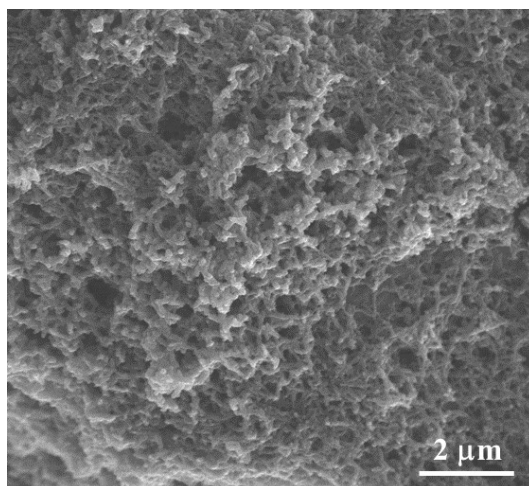

**Fig. S7** SEM image of PANi/CC electrode.

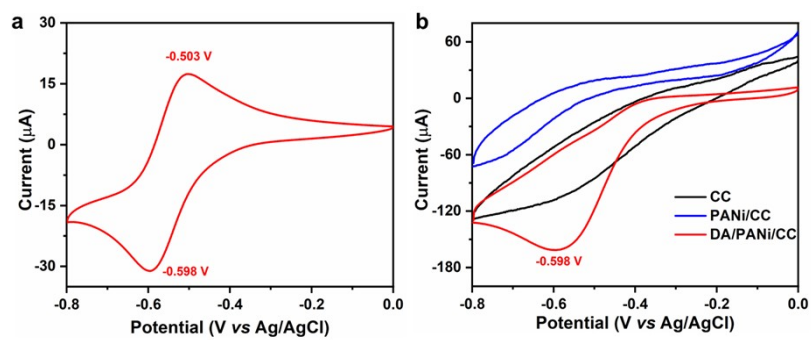

**Fig. S8** (a) Cycle voltammetry curve of DA; (b) Cycle voltammetry curve of CC, PANi/CC and DA/PANi/CC.

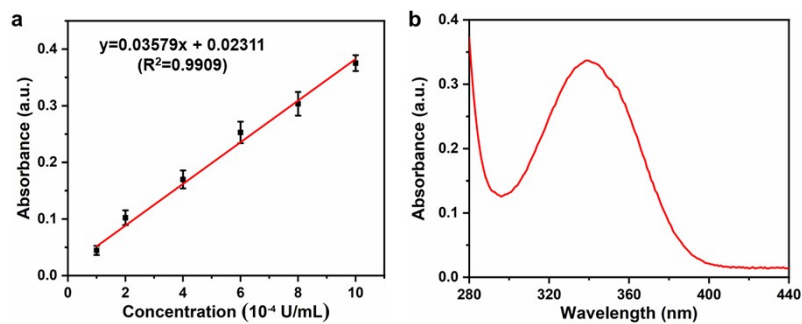

**Fig. S9** (a) Standard curve of UV-vis absorbance of NADH versus concentration of FDH; (b) UV-vis absorbance of NADH of FDH/DA/PANi/CC after repeatedly washing with PBS.

After cross-linking FDH with DA/PANi/CC for 4 hours, the electrode was thoroughly washed with PBS, and the washing solutions were collected. Then, 0.1 mL of above collected solution was incubated with  $\text{NAD}^+$  at 37 °C for 10 min. The absorption of NADH was measured by UV-vis (Fig. S9b), which could be transformed to concentration of free NADH through the linear equation (Fig. S9a).

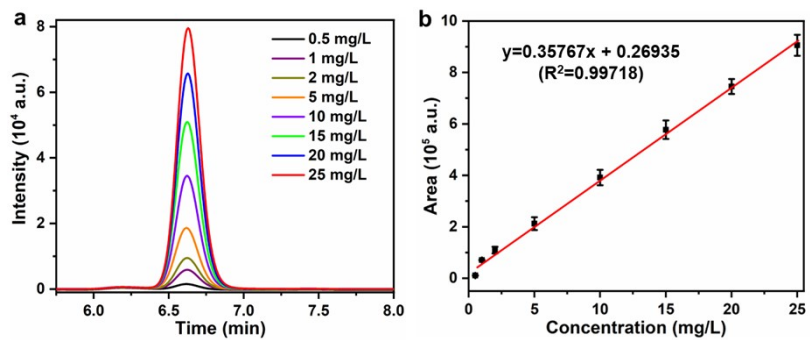

**Fig. S10** (a) Curve of intensity of BPA versus its concentration; (b) Standard curve of peak area of BPA measured by HPLC versus its concentration.

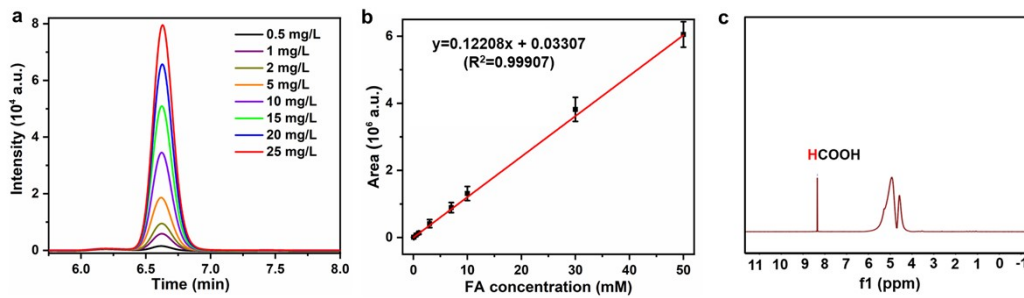

**Fig. S11** (a) Curve of intensity of HCOOH versus its concentration; (b) Standard curve of peak area of HCOOH measured by HPLC versus its concentration; (c)  $^1\text{H-NMR}$  spectrum of the solution after photocatalysis (400  $\mu\text{L}$  solution + 100  $\mu\text{L}$   $\text{D}_2\text{O}$ ).

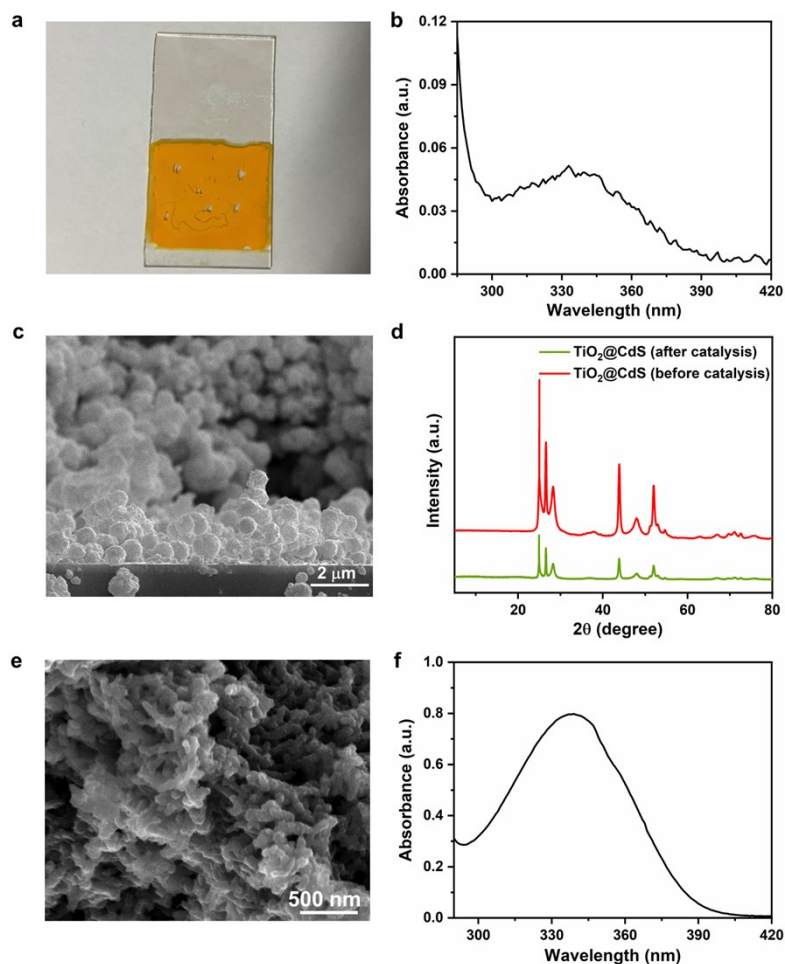

**Fig. S12** (a) The image of  $\text{TiO}_2@\text{CdS}$  photoanode after photocatalytic experiment; (b) The detection of FDH of the cathode solution after photocatalytic experiment by regeneration of NADH; (c) SEM image of anode of the PFC after the 16<sup>th</sup> cycle of catalysis; (d) XRD pattern spectrum of  $\text{TiO}_2@\text{CdS}$  after the 16<sup>th</sup> cycle of catalysis; (e) SEM image of cathode of the PFC after the 16<sup>th</sup> cycle of catalysis; (f) The detection of FDH of FDH/DA/PANi/CC cathode after photocatalytic experiment by regeneration of NADH.

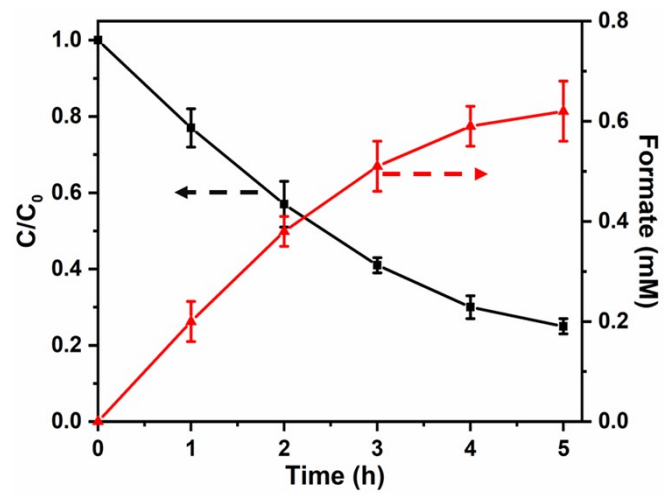

**Fig. S13** The BPA degradation rate and formate production rate in the PFC system driven by the natural sunlight.



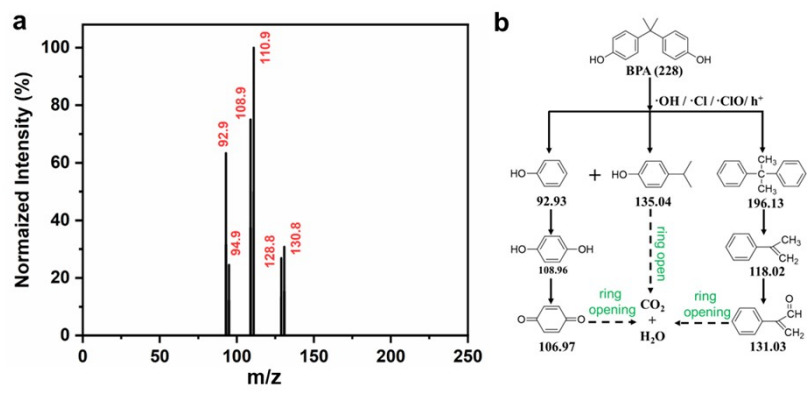

**Fig. S14** (a) LC-MS spectra and proposed byproducts structure of BPA degradation after 3 h PFC reaction; (b) The proposed schematic pathway of BPA degradation via a PFC process.

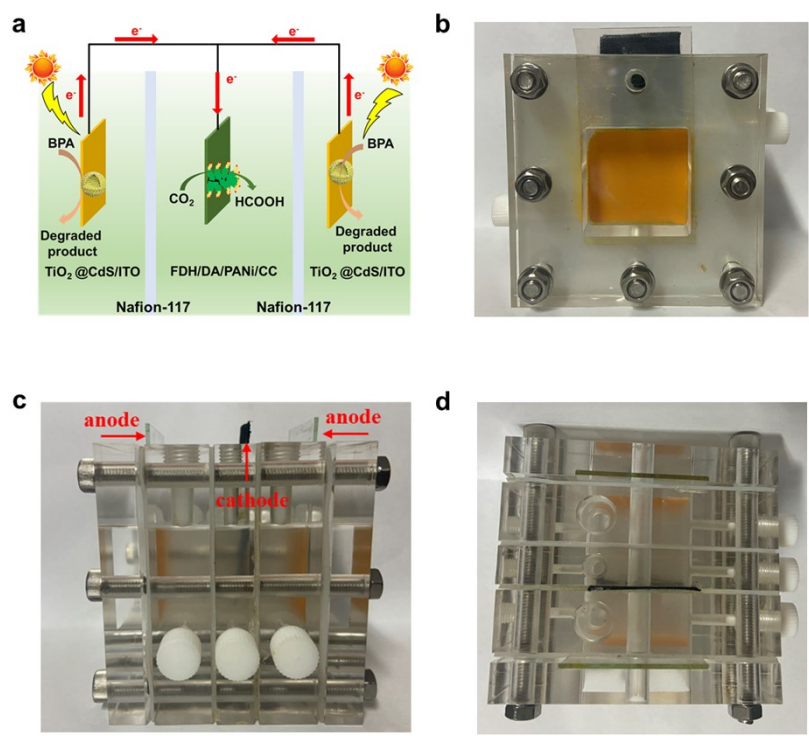

**Fig. S15** (a) Schematic illustration of the 2-PFC system for BPA degradation and CO<sub>2</sub> reduction; Front (b), side (c) and TOP (d) view picture of 2-PFC system.

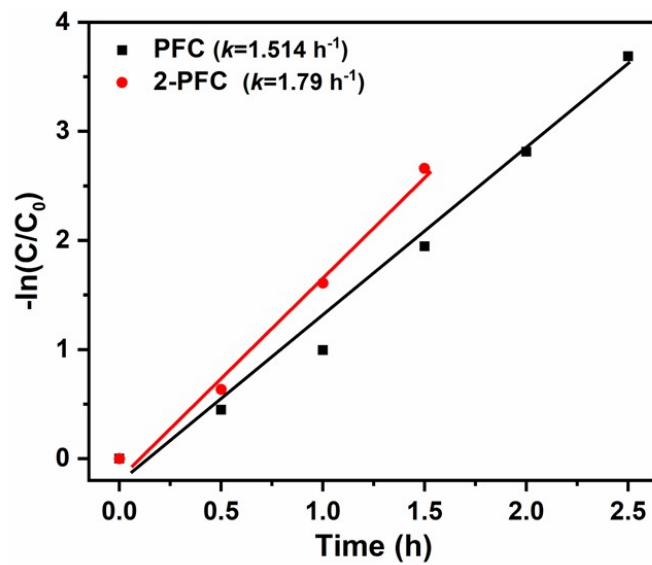

Fig. S16 Plots of  $-\ln(C/C_0)$  versus time for the BPA degradation by PFC and 2-PFC systems.

**Table S1** Comparison of the performance of CO<sub>2</sub> reduction.

| Anode                                 | Cathode                                                   | Catalyst | Electron mediator | Productivity (μmol·U <sup>-1</sup> ·h <sup>-1</sup> ) | Ref      |
|---------------------------------------|-----------------------------------------------------------|----------|-------------------|-------------------------------------------------------|----------|
| FeOOH/BiVO <sub>4</sub> /FTO          | 3D TiN-CIFDH                                              | CIFDH    | -                 | 1.56                                                  | 1        |
| TiO <sub>2</sub> /FTO                 | CFP                                                       | FDH      | MV                | 0.0192                                                | 2        |
| FeOOH-BiVO <sub>4</sub>               | CIFDH-TiO <sub>2</sub> -CFO                               | CIFDH    | -                 | 0.098                                                 | 3        |
| FTO IO-TiO <sub>2</sub>  dpp POs-PSII | FTO IO-TiO <sub>2</sub>  FDH                              | FDH      | -                 | 0.0925                                                | 4        |
| TK/TiO <sub>2</sub>                   | FDH-CH <sub>3</sub> V(CH <sub>2</sub> ) <sub>9</sub> COOH | FDH      | MV derivative     | 0.0025                                                | 5        |
| Ta <sub>3</sub> N <sub>5</sub> NTs    | g-C <sub>3</sub> N <sub>4</sub>                           | FDH      | NAD <sup>+</sup>  | 0.1225                                                | 6        |
| FeOOH/BiVO <sub>4</sub>               | FDH/ITO                                                   | FDH      | NAD <sup>+</sup>  | 0.0078                                                | 7        |
| SnTPyP/SnO <sub>2</sub>               | RuCAT-RuC <sub>2</sub> -PolyPyr-PRu/NiO                   | -        | -                 | 0.062 μmol·h <sup>-1</sup>                            | 8        |
| CoOx/BiVO <sub>4</sub>                | NiO/PRu-PolyPyr-RuC <sub>2</sub> RuCAT <sub>1</sub>       | -        | -                 | 0.34 μmol·h <sup>-1</sup><br>(-0.7 V vs Ag/AgCl)      | 9        |
| TiO <sub>2</sub> @CdS/ITO             | FDH/DA/PANI/C<br>C                                        | FDH      | DA                | 0.74<br>(3.88 μmol·h <sup>-1</sup> )                  | Our work |
| TiO <sub>2</sub> @CdS/ITO<br>(two)    | FDH/DA/PANI/C<br>C                                        | FDH      | DA                | 1.36<br>(7.13 μmol·h <sup>-1</sup> )                  | Our work |

**Table S2** Performance comparison of different PFC systems.

| Anode                                    | Cathode              | Organic compound           | Degradation rate (%) | $V_{OC}$ (V) | $J_{sc}$ (mA $cm^{-2}$ ) | $P_{max}$ ( $\mu W \cdot cm^{-2}$ ) | Ref.     |
|------------------------------------------|----------------------|----------------------------|----------------------|--------------|--------------------------|-------------------------------------|----------|
| Fe@MoS <sub>2</sub>                      | Carbon fiber clothe  | Berberine                  | 92.8                 | 0.325        | 0.01481                  | 0.8                                 | 10       |
| Carbon felt                              | g-FeOOH              | Ametryn                    | 98.7                 | 0.31         | -                        | 44.6                                | 11       |
| 3DP graphene-TiO <sub>2</sub> aerogel    | CNT/PVDF film        | Phenol                     | 96                   | -            | 0.63                     | 110                                 | 12       |
| GDH/SA-TCPP/TiO <sub>2</sub>             | CoNOC/BP             | Phenol                     | 100                  | 0.83         | 0.87                     | 296.9                               | 13       |
| TiO <sub>2</sub> /Ti                     | Cu <sub>2</sub> O/Cu | Volatile organic compounds | 22.6                 | 0.41         | 0.1                      | 20                                  | 14       |
| WO <sub>3</sub>                          | Cu <sub>2</sub> O    | chlorophenol               | 96.8                 | 0.65         | 0.34                     | 120                                 | 15       |
| CN-WO <sub>3</sub> /W                    | Pt                   | PFOA                       | 95                   | 0.47         | 0.27                     | 17                                  | 16       |
| g-C <sub>3</sub> N <sub>4</sub> /BiOI/Ti | Cu <sub>2</sub> O/Cu | RhB                        | 95.39                | 0.55         | 0.62                     | 103.8                               | 17       |
| TiO <sub>2</sub> @CdS/ITO                | FDH/DA/PANI/CC       | BPA                        | 99.9                 | 0.64         | 0.3792                   | 94.1                                | Our work |
| TiO <sub>2</sub> @CdS/ITO (two)          | FDH/DA/PANI/CC       | BPA                        | 99.9                 | 0.74         | 1.3616                   | 186.3                               | Our work |

**Table S3** Photoluminescence quantum yield (PLQY) of TiO<sub>2</sub>, CdS and TiO<sub>2</sub>@CdS.

| Experimental group | TiO <sub>2</sub> | CdS  | TiO <sub>2</sub> @CdS |
|--------------------|------------------|------|-----------------------|
| PLQY (%)           | 0.31             | 5.61 | 2.10                  |

**Table S4** Fitting parameters of PL decay curves for TiO<sub>2</sub>, CdS and TiO<sub>2</sub>@CdS.

| Sample                | $\tau_1$ (ns) | $1/\tau_1$ (ns <sup>-1</sup> ) | $\tau_2$ (ns) | $\tau_2/\tau_1$ | $\tau$ /ns |
|-----------------------|---------------|--------------------------------|---------------|-----------------|------------|
| TiO <sub>2</sub>      | 0.0042        | 238                            | 0.28          | 66.64           | 0.28       |
| CdS                   | 22.33         | 0.045                          | 70.24         | 3.16            | 0.78       |
| TiO <sub>2</sub> @CdS | 20.22         | 0.05                           | 150.77        | 7.54            | 1.71       |

## Supplemented note 1

The related equations for the generation of active species are shown as following:

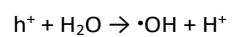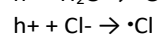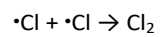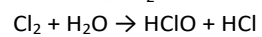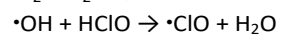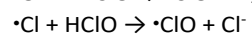



## References

- 1 S.K. Kuk, Y. Ham, K. Gopinath, P. Boonmongkolras, Y. Lee, Y.W. Lee, S. Kondaveeti, C. Ahn, B. Shin, J.K. Lee, S. Jeon, C.B. Park, *Adv. Energy Mater.*, 2019, **9**, 1900029.
- 2 T. Ishibashi, M. Higashi, S. Ikeda, Y. Amao, *ChemCatChem.*, 2019, **11**, 6227-6235.
- 3 S.K. Kuk, J. Jang, J. Kim, Y. Lee, Y.S. Kim, B. Koo, Y.W. Lee, J.W. Ko, B. Shin, J.K. Lee, C.B. Park, *ChemCatChem.*, 2020, **13**, 2940-2944.
- 4 K.P. Sokol, W.E. Robinson, A.R. Oliveira, J. Warnan, M.M. Nowaczyk, A. Ruff, I.A.C. Pereira, E. Reisner, *J. Am. Chem. Soc.*, 2018, **140**, 116418-16422.
- 5 Y. Amao, M. Fujimura, M. Miyazaki, A. Tadokoro, M. Nakamura, N. Shuto, *New J. Chem.*, 2018, **42**, 9269-9280.
- 6 K.Q. Xu, A. Chatzitakis, P.H. Backe, Q.S. Ruan, J.W. Tang, F. Rise, M. Bjoras, T. Norby, *Appl. Catal. B: Environ.*, 2021, **296**, 120349.
- 7 J. Kim, Y.W. Lee, E. Choi, P. Boonmongkolras, B.W. Jeon, H. Lee, S.T. Kim, S.K. Kuk, Y.H. Kim, B. Shin, C.B. Park, *J. Mater. Chem. A*, 2020, **8**, 88496-8502.
- 8 F. Kuttassery, Y. Ohsaki, A. Thomas, R. Kamata, Y. Ebato, H. Kumagai, R. Nakazato, A. Sebastian, S. Mathew, H. Tachibana, O. Ishitani, H. Inoue, *Angew. Chem. Int. Ed.*, 2023, **62**, e202308956.
- 9 F. Kuttassery, H. Kumagai, R. Kamata, Y. Ebato, M. Higashi, H. Suzuki, R. Abe, O. Ishitani, *Chem. Sci.*, 2021, **12**, 13216-13232.
- 10 L. Xu, L.F. Liu, *Appl. Catal. B: Environ.*, 2022, **304**, 120953.
- 11 L. Cai, H.M. Zhang, B. Dong, J. Du, Y. Tian, F. Zhang, *J. Hazard. Mater.*, 2023, **448**, 130980.
- 12 C.J. Zhang, X.Y. Qiao, Y.H. You, Z. He, Y.F. Wang, P. Li, Y.Y. Zhang, H.L. Fu, Z.P. Yang, *Chem. Eng. J.*, 2024, **490**, 151480.
- 13 J. Ding, J.G. Zhao, H. Zhang, S.J. Dong, *Biosens. Bioelectron.*, 2024, **266**, 116714.
- 14 C.Y. Wang, Y.X. Liu, R. Chen, X. Zhu, D.D. Ye, Y. Yang, Q. Liao, *J. Hazard. Mater.*, 2023, **447**, 130769.
- 15 X.F. Liu, S.J. You, N.Q. Ren, H. Zhou, J.N. Zhang, *J. Hazard. Mater.*, 2021, **416**, 11125682.
- 16 D. Zhang, W.J. Zhang, J.J. Zhang, L.M. Dong, X.P. Chen, Y.H. Guan, Z.N. Wang, Y.M. Li, *Chem. Eng. J.*, 2024, **480**, 147910.
- 17 Y.D. Zeng, Y.L. Xu, D.J. Zhong, H.Y. Yao, N.B. Zhong, *J. Hazard. Mater.*, 2022, **425**, 127967.
